# Supplementary material
Source: PubMed Central journal article supplement (PMC5827590)
Supplement: ASN.2017030361SupplementaryData1.pdf [file ASN.2017030361SupplementaryData1.pdf]

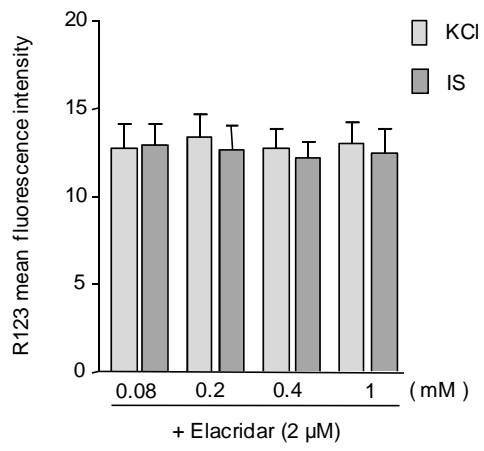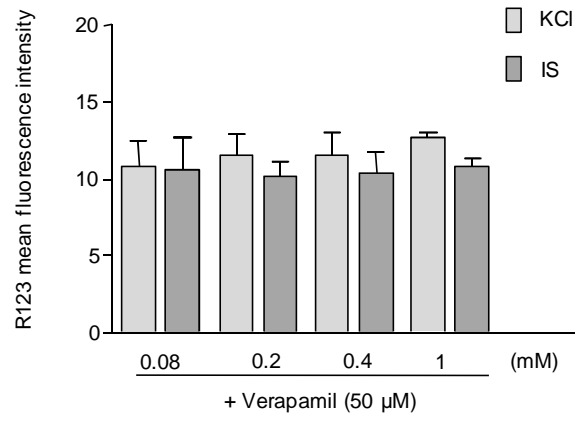

### Supplemental Figure 1

Flow cytometry analysis of P-gp activity in presence of P-gp inhibitors: (A) Elacridar (2 μM) and (B) Verapamil (50 μM).

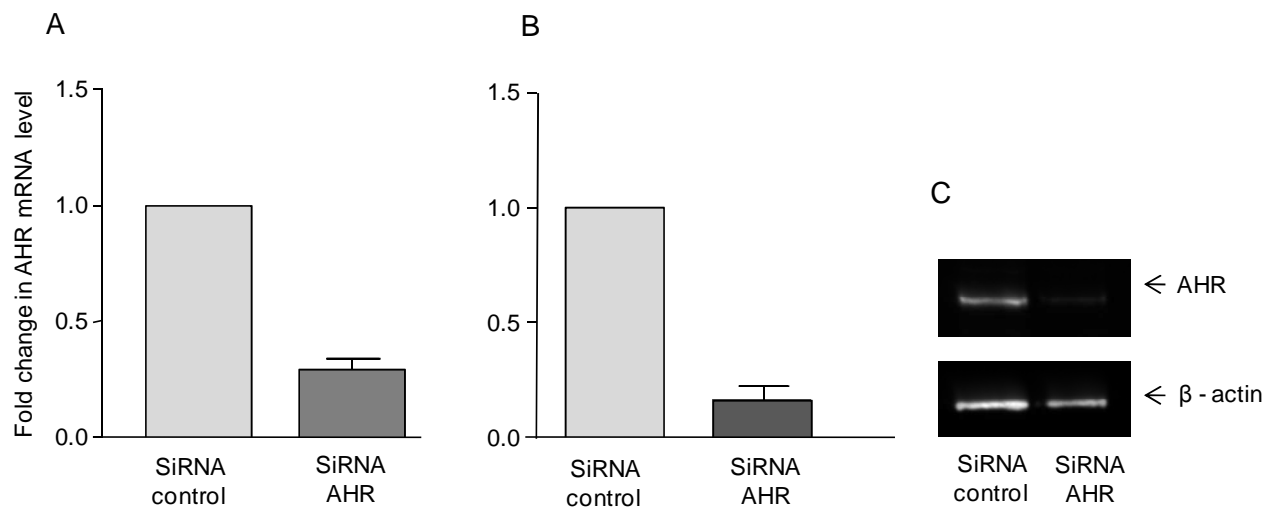

### Supplemental Figure 2

AHR mRNA (A) and protein levels (B) in HepG2 cells treated with siRNA control or siRNA AHR. For the analysis of protein levels by densitometry, western blot images were captured using the Syngene GBox (Ozyme, Saint Quentin en Yvelines, France) and analyzed with the software geneSys (Ozyme). Results were expressed as a ratio between values obtained with SiRNA AHR and SiRNA control, normalized with values obtained with actin. mRNA levels was decrease by 65% and protein levels by 83%. Data are expressed as mean  $\pm$  SEM of (A, B) four independent experiments. (C) Representative Western blot.

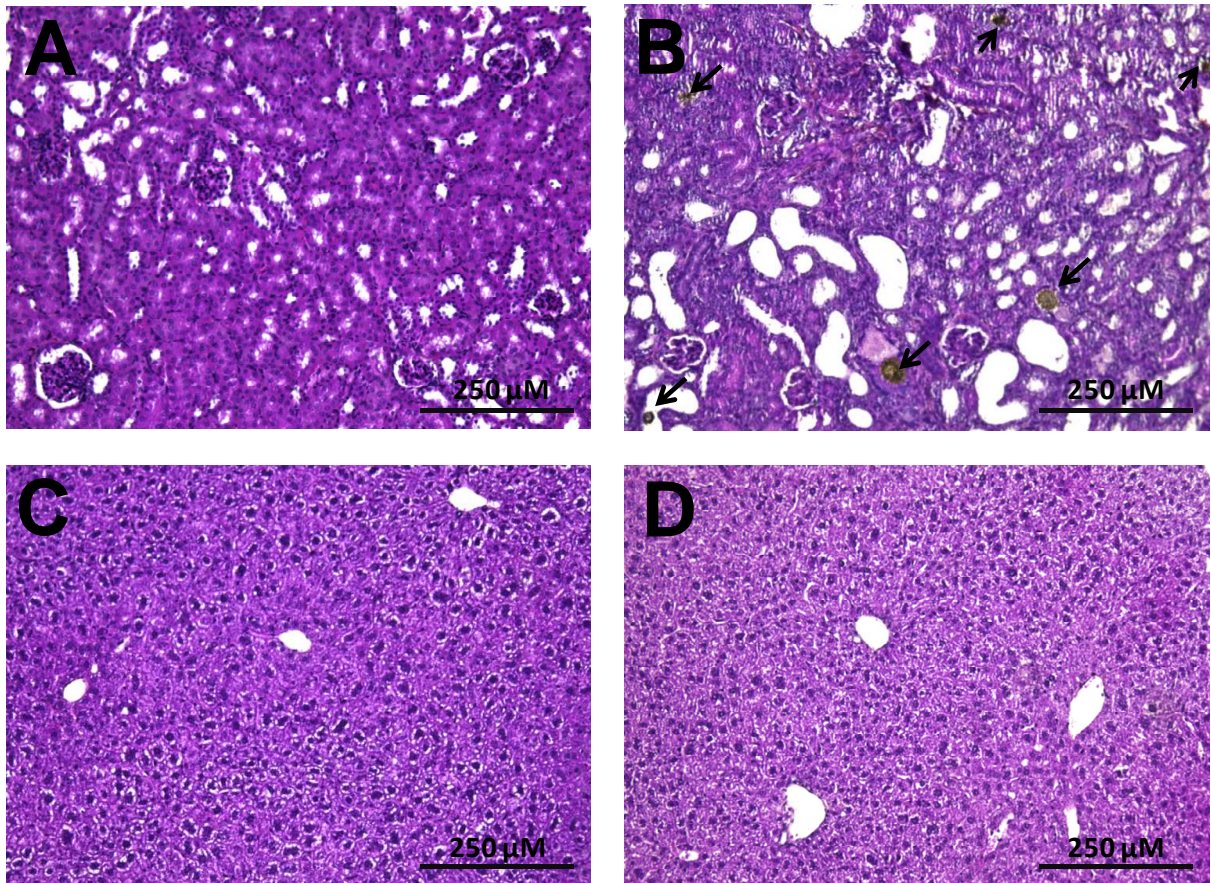

### Supplemental Figure 3

Histology using hematoxylin-eosin staining of kidney (A and B) and liver (C and D) of mice from control diet group (A and C) and adenine diet group (B and D). Arrows point to crystals. Liver histology of all groups is consistent with normal hepatic structure.

| Gene (Transporter) | Primers                      |                              |
|--------------------|------------------------------|------------------------------|
| SLC10A1 (NTPC)     | F 5' GGCTTCTCCTCATTGCCATA 3' | R 5' GGCTTTCAGAATTGCTTTGG 3' |
| SLC22A1 (OCT1)     | F 5' CCTGCCTCGTCATGATTTTT 3' | R 5' CTCCATCTTCATCCCTCAA 3'  |
| SLC22A7 (OAT2)     | F 5' CCTCCAAGCTGCTGGTCTAC 3' | R 5' CATCCCTGTCTGTCTGAGCA 3' |
| SLC47A1 (MATE1)    | F 5' TCAGGTACACGCCAATTTGA 3' | R 5' CCAGCTGTTTCCTGGACAAT 3' |
| SLCO1B1 (OATP1B1)  | F 5' GCCCAAGAGATGATGCTTGT 3' | R 5' ATTGAGTGAAACCCAGTGC 3'  |
| SLCO1B3 (OATP1B3)  | F 5' CAACAGCTGTGGAGCACAAG 3' | R 5' TCCGATGCCTTGGTATCTTT 3' |
| SLCO2B1 (OATP2B1)  | F 5' TAATGACCTGCTCCGAAACC 3' | R 5' GACAGCTCACACTCGGGAAT 3' |
| ABCB1 (MDR1; P-GP) | F 5' AGGCCAACATACATGCCTTC 3' | R 5' CCTTCTCTGGCTTTGTCCAG 3' |
| ABCB11 (BSEP)      | F 5' GTTTGTGGGAGCAGTGGAT 3'  | R 5' GGCAAACAACACTGGTTCCT 3' |
| ABCC2 (MRP2)       | F 5' GACGACCATCCAAAACGAGT 3' | R 5' GGGCCTTCTGCTAGAAATTT 3' |
| ABCC3 (MRP3)       | F 5' TCATCAATCCACAGCTGCTC 3' | R 5' ACGCACGTTTGACTGAGTTG 3' |
| ABCC4 (MRP4)       | F 5' TGATGAGCCGTATGTTTTGC 3' | R 5' CTTCGGAACGGACTTGACAT 3' |
| ABCC6 (MRP6)       | F 5' GGAACCAGACAGAGCCTGAA 3' | R 5' GCTTTGAAGAGTGGGGACAT 3' |
| ABCG2 (BCRP)       | F 5' ATCTTGGCTGTCATGGCTTC 3' | R 5' GAGATCGATGCCCTGCTTTA 3' |

**Supplemental Table 1 | Sequences of primers used in RT-qPCR experiments**
